# Supplementary material
Source: PubMed Central journal article supplement (PMC4126621)

EC  $\mu\text{S cm}^{-1}$  (quantiles)

- 53.7-131.2 (0-50%)
- 131.3-167.5 (51-75%)
- 167.6-243.2 (76-90%)
- 243.2-1566.4 (91-100%)

TOS

pH values (quantiles)

- 5.03-6.28 (0-50%)
- 6.29-6.56 (51-75%)
- 6.57-6.90 (76-90%)
- 6.91-7.80 (91-100%)

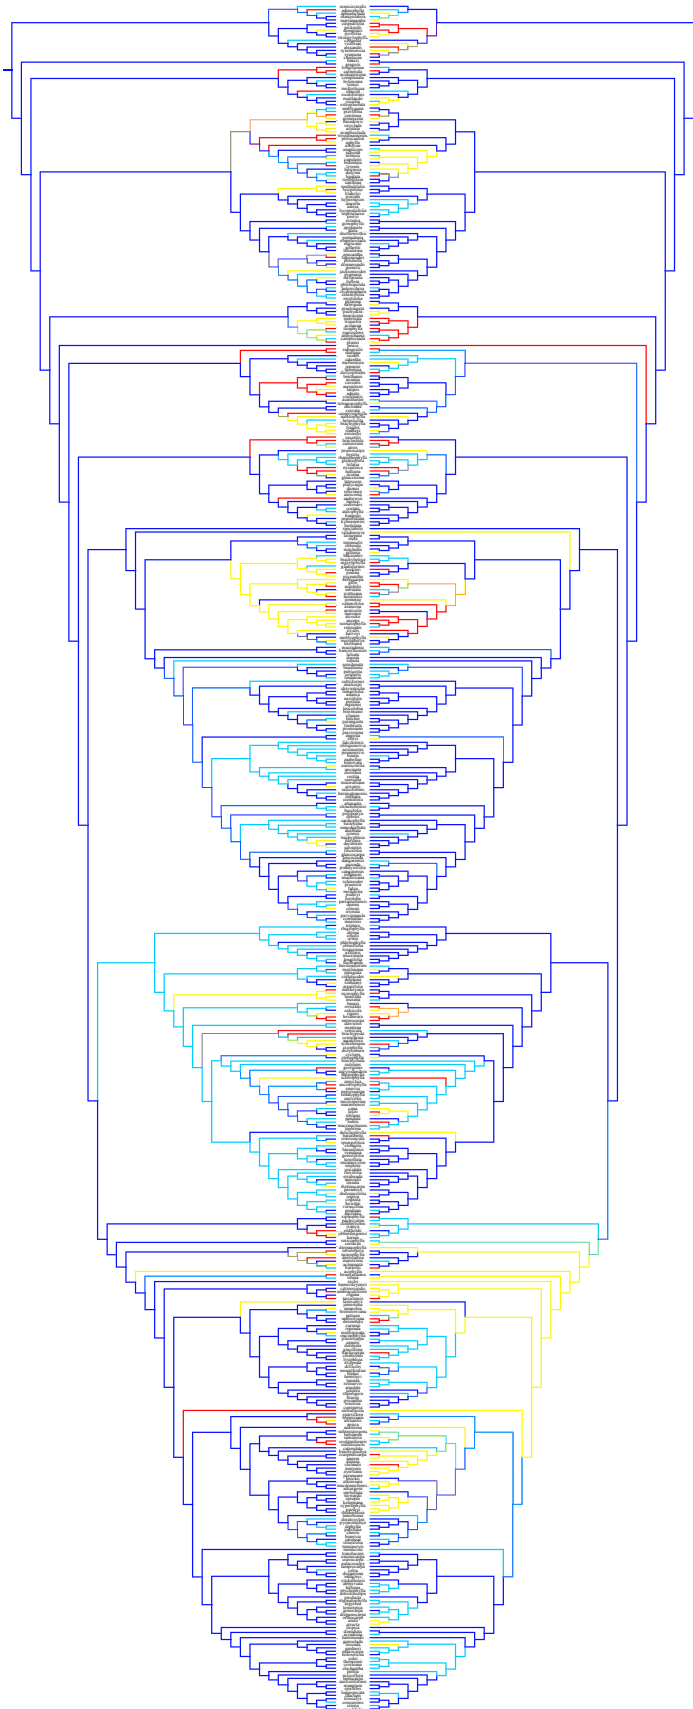

Supplement: rsbl20140278supp2.pdf [file rsbl20140278supp2.pdf]
